# Supplementary material
Source: PubMed Central journal article supplement (PMC6328281)
Supplement: ja8b07452_si_001.pdf [file ja8b07452_si_001.pdf]

Supporting Information for

**In situ electrochemical AFM imaging of Pt electrode in sulfuric acid  
under potential cycling conditions**

Xin Deng<sup>1)</sup>, Federica Galli<sup>2)</sup>, Marc T. M. Koper<sup>1)\*</sup>

<sup>1)</sup>Leiden Institute of Chemistry, Leiden University, PO Box 9502, 2300 RA, Leiden, The Netherlands

<sup>2)</sup>Huygens-Kamerlingh Onnes Laboratory, Leiden University, Niels Bohrweg 2, 2333 CA Leiden, The Netherlands

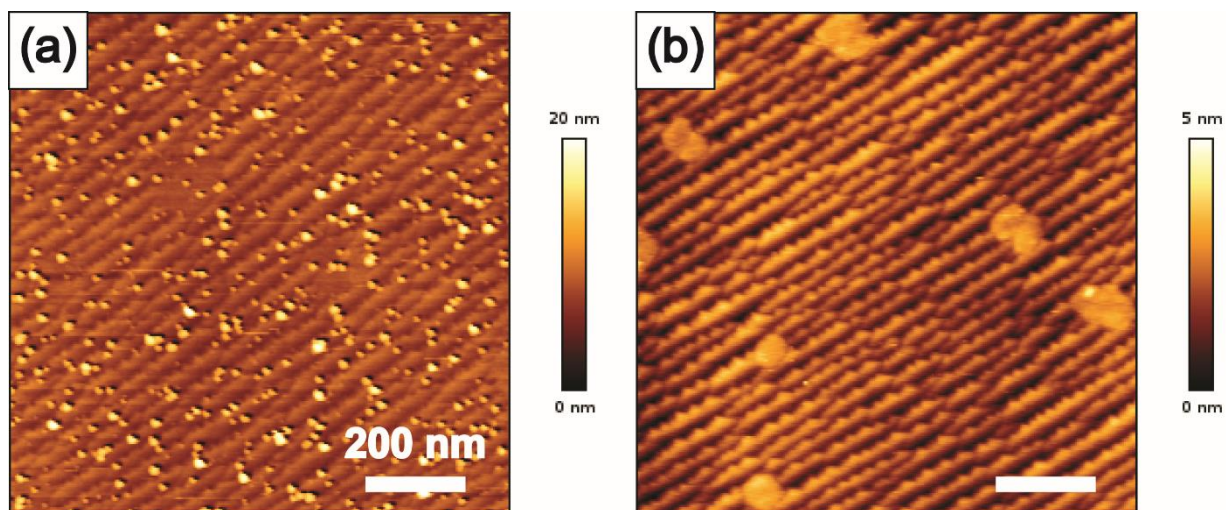

Figure S1. The AFM height image of Pt surface (a) after the formation of nanoparticles, (b) followed by holding the potential at 1.4 V for 5 min. The scale bars are 200 nm.

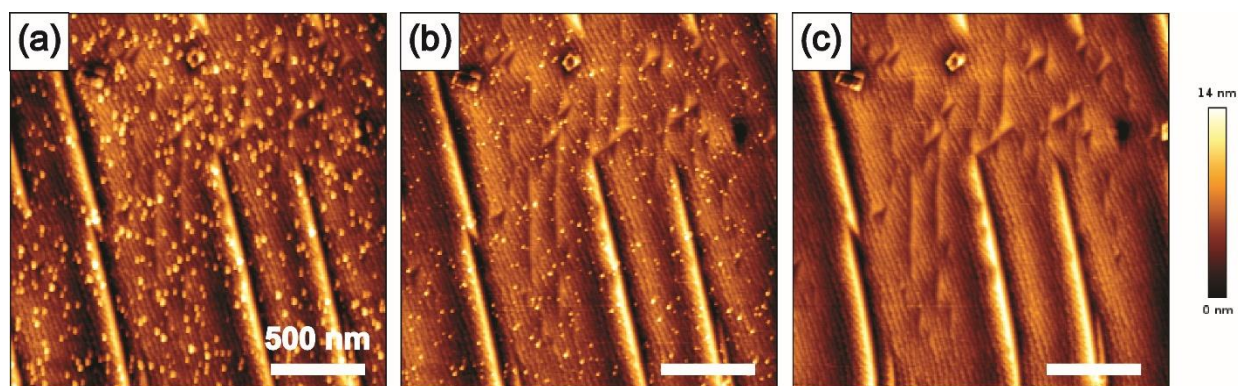

Figure S2. The AFM height image of Pt surface (a) after the formation of nanoparticles, (b) followed by potential excursion between 0.05-1.2 V, (c) followed by additional potential excursion between 0.05-1.4 V. The scale bars are 500 nm.
